# Supplementary material for: Rendered-Protein Hydrolysates as a Low-Cost Nitrogen Source for the Fungal Biotransformation of 5-Hydroxymethylfurfural
Source: MDPI journal article supplement (doi:10.3390/catal12080839), 2022-07-30
Supplement: s1 [file s1]

Archive with 1 entries (1 files):
- catalysts-1787725-supplementary.pdf
